# Supplementary material for: Pore-expansion of monodisperse mesoporous silica spheres by a novel surfactant exchange method
Source: Royal Society of Chemistry journal article supplement (doi:10.1039/b613163h), 2006-12-19
Supplement: b613163h.pdf [file b613163h.pdf]

**Pore-Expansion of Monodisperse Mesoporous Silica Spheres  
by a Novel Surfactant Exchange Method**

Mamoru Mizutani,\* Yuri Yamada and Kazuhisa Yano

*Toyota Central Research & Development Laboratories, Incorporated,  
Nagakute, Aichi 488-1192, Japan*

mizutani@mosk.tytlabs.co.jp (M. Mizutani), k-yano@mosk.tytlabs.co.jp (K. Yano)

**Contents**

1. Powder X-ray diffraction (XRD) patterns of MMSS-n and PS22-MMSS-n (Fig. S1).
2. Matrix assisted laser desorption ionization time-of-flight mass spectrometry (MALDI-TOF/MS) and electrospray ionization liquid chromatography mass spectrometry (ESI-LC/MS) spectra of PS22-MMSS-10 and its extract (Figs. S2 and S3).

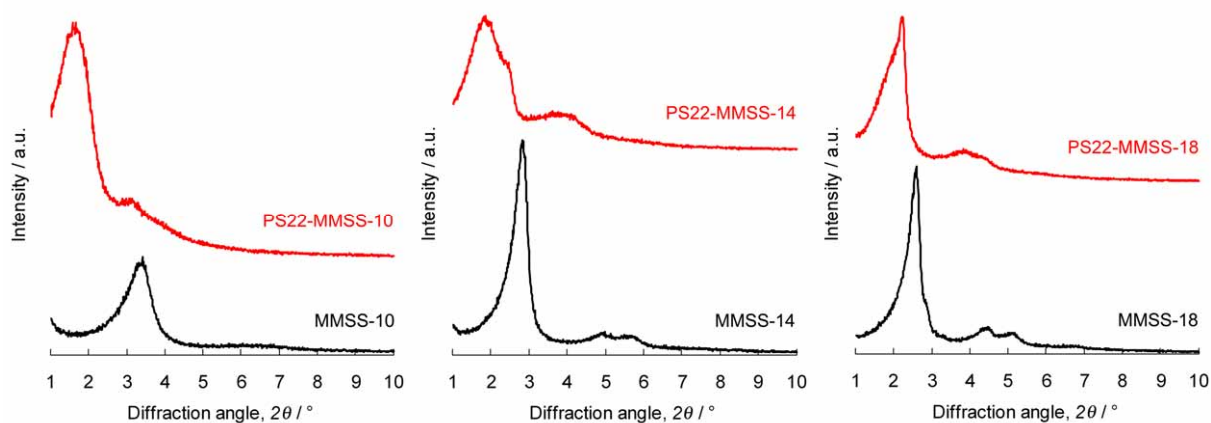

**Fig. S1** XRD patterns of MMSS-*n* and PS22-MMSS-*n*<sup>a</sup>.  
<sup>a</sup> Small shoulders are observed in XRD patterns of PS22-MMSS-10 and -14.  
 These are assumed to originate from insufficiently expanded mesopores.

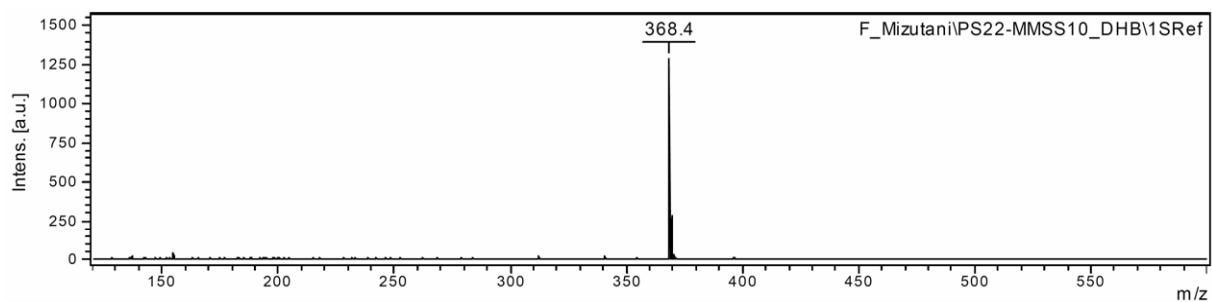

**Fig. S2** The MALDI-TOF/MS spectrum of PS22-MMSS-10.

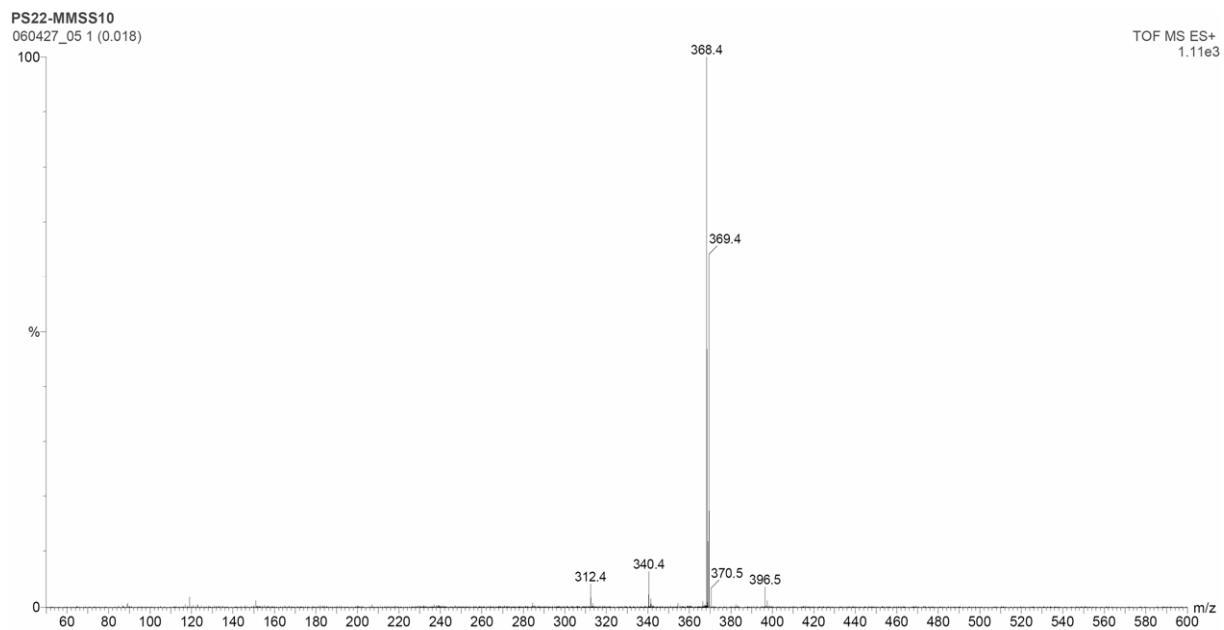

**Fig. S3** The ESI-LC/MS spectrum of surfactant extracted from PS22-MMSS-10.
